# Supplementary material for: A General Small-Angle X-ray Scattering-Based Screening Protocol for Studying Physical Stability of Protein Formulations
Source: MDPI journal article supplement (doi:10.3390/pharmaceutics14010069), 2021-12-28
Supplement: s1 [file s1]

# Supplementary Materials: A General Small-Angle X-ray Scattering-Based Screening Protocol for Studying Physical Stability of Protein Formulations

Fangrong Zhang, Gesa Richter, Benjamin Bourgeois, Emil Spreitzer, Armin Moser, Andreas Keilbach, Petra Kotnik and Tobias Madl

|   | 1                    | 2                   | 3                   | 4                    | 5                    | 6                              | 7                              | 8                | 9                | 10                       | 11                | 12             |
|---|----------------------|---------------------|---------------------|----------------------|----------------------|--------------------------------|--------------------------------|------------------|------------------|--------------------------|-------------------|----------------|
| A | H <sub>2</sub> O     | empty               | empty               | empty                | empty                | empty                          | empty                          | empty            | empty            | empty                    | empty             | empty          |
| B | Citrate,<br>pH 5.5   | Malonate,<br>pH 5.5 | MES,<br>pH 6.0      | BIS-TRIS,<br>pH 6.5  | Phosphate,<br>pH 7.0 | Imidazole,<br>pH 6.2           | BIS-TRIS<br>Propane,<br>pH 7.0 | MOPS,<br>pH 8.0  | TAPSO,<br>pH 7.0 | Tricine,<br>pH 7.5       | Bicine,<br>pH 8.0 | SPG,<br>pH 5.5 |
| C | Citrate,<br>pH 6.0   | Malonate,<br>pH 6.0 | MES,<br>pH 6.5      | BIS-TRIS,<br>pH 7.0  | Phosphate,<br>pH 7.5 | Imidazole,<br>pH 6.5           | BIS-TRIS<br>Propane,<br>pH 7.5 | HEPES,<br>pH 7.0 | TAPSO,<br>pH 7.5 | Tricine,<br>pH 8.0       | Bicine,<br>pH 8.5 | SPG,<br>pH 6.0 |
| D | Citrate,<br>pH 6.5   | Malonate,<br>pH 6.5 | MES,<br>pH 6.7      | ADA,<br>pH 6.0       | Phosphate,<br>pH 8.0 | Imidazole,<br>pH 7.0           | BIS-TRIS<br>Propane,<br>pH 8.0 | HEPES,<br>pH 7.5 | TAPSO,<br>pH 8.0 | Tricine,<br>pH 8.5       | TAPS,<br>pH 7.7   | SPG,<br>pH 6.5 |
| E | Citrate,<br>pH 7.0   | Malonate,<br>pH 7.0 | Maleate,<br>pH 6.0  | ADA,<br>pH 6.5       | PIPES,<br>pH 6.1     | Imidazole,<br>pH 7.5           | BIS-TRIS<br>Propane,<br>pH 8.5 | HEPES,<br>pH 8.0 | TRIS,<br>pH 7.1  | Glycylglycine,<br>pH 7.5 | TAPS,<br>pH 8.0   | SPG,<br>pH 7.0 |
| F | Succinate,<br>pH 5.5 | Malonate,<br>pH 7.5 | Maleate,<br>pH 6.5  | ADA,<br>pH 7.0       | PIPES,<br>pH 6.5     | Imidazole,<br>pH 7.8           | MOPS,<br>pH 6.5                | DIPSO,<br>pH 7.0 | TRIS,<br>pH 7.5  | Glycylglycine,<br>pH 8.0 | TAPS,<br>pH 8.5   | SPG,<br>pH 7.5 |
| G | Succinate,<br>pH 6.0 | Malonate,<br>pH 8.0 | Maleate,<br>pH 7.0  | Phosphate,<br>pH 6.0 | PIPES,<br>pH 7.0     | BIS-TRIS<br>Propane,<br>pH 6.3 | MOPS,<br>pH 7.0                | DIPSO,<br>pH 7.5 | TRIS,<br>pH 8.0  | Glycylglycine,<br>pH 8.5 | AMPD,<br>pH 8.0   | SPG,<br>pH 8.0 |
| H | Succinate,<br>pH 6.5 | MES,<br>pH 5.5      | BIS-TRIS,<br>pH 6.0 | Phosphate,<br>pH 6.5 | PIPES,<br>pH 7.5     | BIS-TRIS<br>Propane,<br>pH 6.5 | MOPS,<br>pH 7.5                | DIPSO,<br>pH 8.0 | TRIS,<br>pH 8.5  | Bicine,<br>pH 7.6        | AMPD,<br>pH 8.5   | SPG,<br>pH 8.5 |

**Table S1.** JBScreen Buffers contain common buffer stocks (0.5 M concentration) in the neutral pH range (5.5 - 8.5) in useful 0.5 pH unit increments. SPG buffer (column 12) is produced by mixing Succinic acid:Sodium dihydrogen phosphate:Glycine in the molar ratios 2:7:7. This 'Super Buffer' screens the pH range from 4.0 to 10.0 without changing the chemical composition of the buffer solution.

```
#!/bin/csh
```

rm \*.csv

```
rm filenames.txt
```

dos2unix \*.dat

```
foreach SAXSfile (`echo *.dat`)
```

```
#foreach SAXSfile (`echo RB1.dat`)
```

```
sed '/^#/d' $SAXSfile > temp
```

```
sed -e 's/,/ /g' temp > $SAXSfile.clean
```

```
awk '{print $2}' $SAXSfile.clean > $SAXSfile.Int.txt
```

```
echo -n $SAXSfile >> filenames.txt
```

```
echo -n " " >> filenames.txt
```

end

```
awk '{print $1}' $SAXSfile.clean > qrange.txt
```

```
paste *.Int.txt > SAXSCombined.txt
```

```
rm temp *.clean *.Int.txt *.clean
```

```
echo ""
```

```
echo "*****"
```

echo " FINISHED "

```
echo "*****"
```

echo ""
